# Supplementary material for: Ceftolozane/Tazobactam and Imipenem/Relebactam Cross-Susceptibility Among Clinical Isolates of Pseudomonas aeruginosa From Patients With Respiratory Tract Infections in ICU and Non-ICU Wards—SMART United States 2017–2019
Source: PubMed Central journal article supplement — Open Forum Infect Dis. 2021 Jun 16;8(7):ofab320. doi: 10.1093/ofid/ofab320 (PMC8297703; doi:10.1093/ofid/ofab320), 2021-06-16
Supplement: ofab320_suppl_supplementary_materials.pdf [file ofab320_suppl_supplementary_materials.pdf]

**Ceftolozane/tazobactam and imipenem/relebactam cross-susceptibility among clinical isolates of *Pseudomonas aeruginosa* from patients with respiratory tract infections in ICU and non-ICU wards – SMART United States 2017-2019**

Sibylle H. Lob,<sup>1</sup> Daryl D. DePestel<sup>2</sup>, C. Andrew DeRyke<sup>2</sup>, Krystyna M. Kazmierczak<sup>1</sup>, Katherine Young,<sup>2</sup> Mary R. Motyl,<sup>2</sup> and Daniel F. Sahm<sup>1</sup>

<sup>1</sup>IHMA, Schaumburg, Illinois, USA; <sup>2</sup>Merck & Co., Inc., Kenilworth, New Jersey, USA

**Supplemental Materials**

Supplemental Table S1. Activity of C/T and IMI/REL against pan- $\beta$ -lactam-nonsusceptible *P. aeruginosa* collected from patients in (a) ICUs and (b) non-ICU wards in 2017-2019

a) ICU

|                    |                | IMI/REL     |                | Number of isolates |
|--------------------|----------------|-------------|----------------|--------------------|
|                    |                | Susceptible | Nonsusceptible |                    |
| C/T                | Susceptible    | 38 (42.2%)  | 21 (23.3%)     | 59                 |
|                    | Nonsusceptible | 13 (14.4%)  | 18 (20.0%)     | 31                 |
| Number of isolates |                | 51          | 39             | 90                 |

b) Non-ICU

|                    |                | IMI/REL     |                | Number of isolates |
|--------------------|----------------|-------------|----------------|--------------------|
|                    |                | Susceptible | Nonsusceptible |                    |
| C/T                | Susceptible    | 36 (55.4%)  | 11 (16.9%)     | 47                 |
|                    | Nonsusceptible | 5 (7.7%)    | 13 (20.0%)     | 18                 |
| Number of isolates |                | 41          | 24             | 65                 |

Supplemental Table S2. Activity of C/T and IMI/REL against DTR *P. aeruginosa* collected from patients in (a) ICUs and (b) non-ICU wards in 2017-2019

a) ICU

|                    |                | IMI/REL     |                | Number of isolates |
|--------------------|----------------|-------------|----------------|--------------------|
|                    |                | Susceptible | Nonsusceptible |                    |
| C/T                | Susceptible    | 27 (37.5%)  | 17 (23.6%)     | 44                 |
|                    | Nonsusceptible | 12 (16.7%)  | 16 (22.2%)     | 28                 |
| Number of isolates |                | 39          | 33             | 72                 |

b) Non-ICU

|                    |                | IMI/REL     |                | Number of isolates |
|--------------------|----------------|-------------|----------------|--------------------|
|                    |                | Susceptible | Nonsusceptible |                    |
| C/T                | Susceptible    | 28 (50.0%)  | 11 (19.6%)     | 39                 |
|                    | Nonsusceptible | 4 (7.1%)    | 13 (23.2%)     | 17                 |
| Number of isolates |                | 32          | 24             | 56                 |

Table S3. Antimicrobial susceptibility to ceftolozane/tazobactam, imipenem/relebactam, ceftazidime/avibactam, and comparators among all *P. aeruginosa* and isolates with nonsusceptible phenotypes, 2018-2019

| Phenotype/<br>ward type (n) | % Susceptible              |                         |                           |          |           |          |             |                             |           |                   |          |
|-----------------------------|----------------------------|-------------------------|---------------------------|----------|-----------|----------|-------------|-----------------------------|-----------|-------------------|----------|
|                             | Ceftolozane/<br>tazobactam | Imipenem/<br>relebactam | Ceftazidime/<br>avibactam | Imipenem | Meropenem | Cefepime | Ceftazidime | Piperacillin/<br>tazobactam | Aztreonam | Levo-<br>floxacin | Amikacin |
| All                         |                            |                         |                           |          |           |          |             |                             |           |                   |          |
| ICU (495)                   | 96.0                       | 91.5                    | 93.7                      | 64.4     | 72.9      | 78.0     | 76.6        | 72.3                        | 68.1      | 66.7              | 96.2     |
| Non-ICU (583)               | 96.7                       | 94.2                    | 96.7                      | 69.0     | 79.8      | 83.0     | 82.9        | 79.4                        | 72.2      | 61.9              | 96.6     |
| Meropenem-NS                |                            |                         |                           |          |           |          |             |                             |           |                   |          |
| ICU (134)                   | 87.3                       | 68.7                    | 79.9                      | 4.5      | 0.0       | 47.0     | 51.5        | 38.8                        | 30.6      | 32.1              | 89.6     |
| Non-ICU (118)               | 89.8                       | 72.9                    | 89.0                      | 8.5      | 0.0       | 54.2     | 61.9        | 46.6                        | 34.8      | 29.7              | 90.7     |
| Piperacillin/tazobactam-NS  |                            |                         |                           |          |           |          |             |                             |           |                   |          |
| ICU (137)                   | 86.9                       | 77.4                    | 78.8                      | 38.7     | 40.2      | 26.3     | 21.9        | 0.0                         | 8.8       | 35.8              | 92.0     |
| Non-ICU (120)               | 87.5                       | 78.3                    | 86.7                      | 46.7     | 47.5      | 35.0     | 30.0        | 0.0                         | 17.5      | 35.8              | 90.8     |
| Cefepime-NS                 |                            |                         |                           |          |           |          |             |                             |           |                   |          |
| ICU (109)                   | 81.7                       | 73.4                    | 72.5                      | 34.9     | 34.9      | 0.0      | 12.8        | 7.3                         | 5.5       | 31.2              | 87.2     |
| Non-ICU (99)                | 82.8                       | 77.8                    | 83.8                      | 38.4     | 45.5      | 0.0      | 27.3        | 21.2                        | 18.2      | 29.3              | 84.9     |
| Ceftazidime-NS              |                            |                         |                           |          |           |          |             |                             |           |                   |          |
| ICU (116)                   | 82.8                       | 79.3                    | 74.1                      | 41.4     | 44.0      | 18.1     | 0.0         | 7.8                         | 11.2      | 37.9              | 88.8     |
| Non-ICU (100)               | 81.0                       | 86.0                    | 81.0                      | 46.0     | 55.0      | 28.0     | 0.0         | 16.0                        | 17.0      | 37.0              | 89.0     |
| Imipenem-NS                 |                            |                         |                           |          |           |          |             |                             |           |                   |          |
| ICU (176)                   | 91.5                       | 76.1                    | 86.4                      | 0.0      | 27.3      | 59.7     | 61.4        | 52.3                        | 46.0      | 41.5              | 91.5     |
| Non-ICU (181)               | 92.8                       | 81.8                    | 93.4                      | 0.0      | 40.3      | 66.3     | 70.2        | 64.6                        | 55.3      | 44.2              | 92.3     |
| MDR                         |                            |                         |                           |          |           |          |             |                             |           |                   |          |
| ICU (88)                    | 78.4                       | 67.0                    | 69.3                      | 15.9     | 15.9      | 13.6     | 18.2        | 8.0                         | 4.5       | 18.2              | 83.0     |
| Non-ICU (61)                | 75.4                       | 68.9                    | 75.4                      | 18.0     | 23.0      | 13.1     | 18.0        | 11.5                        | 4.9       | 14.8              | 80.3     |
| Pan- $\beta$ -lactam-NS     |                            |                         |                           |          |           |          |             |                             |           |                   |          |
| ICU (54)                    | 74.1                       | 59.3                    | 59.3                      | 0.0      | 0.0       | 0.0      | 0.0         | 0.0                         | 0.0       | 18.5              | 85.2     |
| Non-ICU (32)                | 68.8                       | 65.6                    | 68.8                      | 0.0      | 0.0       | 0.0      | 0.0         | 0.0                         | 0.0       | 9.4               | 81.3     |

| Phenotype/<br>ward type (n)    | % Susceptible              |                         |                           |          |           |          |             |                             |           |                   |          |
|--------------------------------|----------------------------|-------------------------|---------------------------|----------|-----------|----------|-------------|-----------------------------|-----------|-------------------|----------|
|                                | Ceftolozane/<br>tazobactam | Imipenem/<br>relebactam | Ceftazidime/<br>avibactam | Imipenem | Meropenem | Cefepime | Ceftazidime | Piperacillin/<br>tazobactam | Aztreonam | Levo-<br>floxacin | Amikacin |
| <b>DTR</b>                     |                            |                         |                           |          |           |          |             |                             |           |                   |          |
| ICU (43)                       | 67.4                       | 55.8                    | 51.2                      | 0.0      | 0.0       | 0.0      | 0.0         | 0.0                         | 0.0       | 0.0               | 81.4     |
| Non-ICU (28)                   | 64.3                       | 60.7                    | 67.9                      | 0.0      | 0.0       | 0.0      | 0.0         | 0.0                         | 0.0       | 0.0               | 78.6     |
| <b>C/T-NS</b>                  |                            |                         |                           |          |           |          |             |                             |           |                   |          |
| ICU (20)                       | 0.0                        | 60.0                    | 35.0                      | 25.0     | 15.0      | 0.0      | 0.0         | 10.0                        | 5.0       | 10.0              | 55.0     |
| Non-ICU (19)                   | 0.0                        | 68.4                    | 42.1                      | 31.6     | 36.8      | 10.5     | 0.0         | 21.1                        | 10.5      | 5.3               | 68.4     |
| <b>IMI/REL-NS</b>              |                            |                         |                           |          |           |          |             |                             |           |                   |          |
| ICU (42)                       | 81.0                       | 0.0                     | 66.7                      | 0.0      | 0.0       | 31.0     | 42.9        | 26.2                        | 19.1      | 16.7              | 78.6     |
| Non-ICU (34)                   | 82.4                       | 0.0                     | 79.4                      | 2.9      | 5.9       | 35.3     | 58.8        | 23.5                        | 20.6      | 11.8              | 79.4     |
| <b>Ceftazidime/avibactam-R</b> |                            |                         |                           |          |           |          |             |                             |           |                   |          |
| ICU (31)                       | 58.1                       | 54.8                    | 0.0                       | 22.6     | 12.9      | 3.2      | 3.2         | 6.5                         | 3.2       | 12.9              | 80.7     |
| Non-ICU (19)                   | 42.1                       | 63.2                    | 0.0                       | 36.8     | 31.6      | 15.8     | 0.0         | 15.8                        | 5.3       | 15.8              | 79.0     |

NS, nonsusceptible (intermediate or resistant MICs); MDR, multidrug-resistant; DTR, difficult-to-treat resistance; R, resistant.
